# Supplementary material
Source: PubMed Central journal article supplement (PMC7948079)
Supplement: mjaa067_supplementary_data.pdf [file mjaa067_supplementary_data.pdf]

## Supplementary material

### **SARS-CoV-2 Spike protein binds to bacterial lipopolysaccharide and boosts proinflammatory activity**

Ganna Petruk<sup>1,†</sup>, Manoj Puthia<sup>1,†</sup>, Jitka Petrlova<sup>1</sup>, Firdaus Samsudin<sup>2</sup>, Ann-Charlotte Strömdahl<sup>1</sup>, Samuel Cerps<sup>3</sup>, Lena Uller<sup>3</sup>, Sven Kjellström<sup>4</sup>, Peter J. Bond<sup>2,5</sup>, and Artur Schmidtchen<sup>1,6,7,\*</sup>

<sup>1</sup> Division of Dermatology and Venereology, Department of Clinical Sciences, Lund University, SE-22184 Lund, Sweden

<sup>2</sup> Bioinformatics Institute (BII), Agency for Science, Technology and Research (A\*STAR), Singapore 138671, Singapore

<sup>3</sup> Unit of Respiratory Immunopharmacology, Department of Experimental Medicine, Lund University, SE-22184 Lund, Sweden

<sup>4</sup> Division of Mass Spectrometry, Department of Clinical Sciences, Lund University, SE-22184 Lund, Sweden

<sup>5</sup> Department of Biological Sciences, National University of Singapore, Singapore 117543, Singapore

<sup>6</sup> Copenhagen Wound Healing Center, Bispebjerg Hospital, Department of Biomedical Sciences, University of Copenhagen, DK-2400 Copenhagen, Denmark

<sup>7</sup> Dermatology, Skåne University Hospital, SE-22185 Lund, Sweden

† These authors contributed equally to this work.

\* Correspondence to: Artur Schmidtchen, Tel.: +46 462224522; E-mail: artur.schmidtchen@med.lu.se

## Supplementary Figures

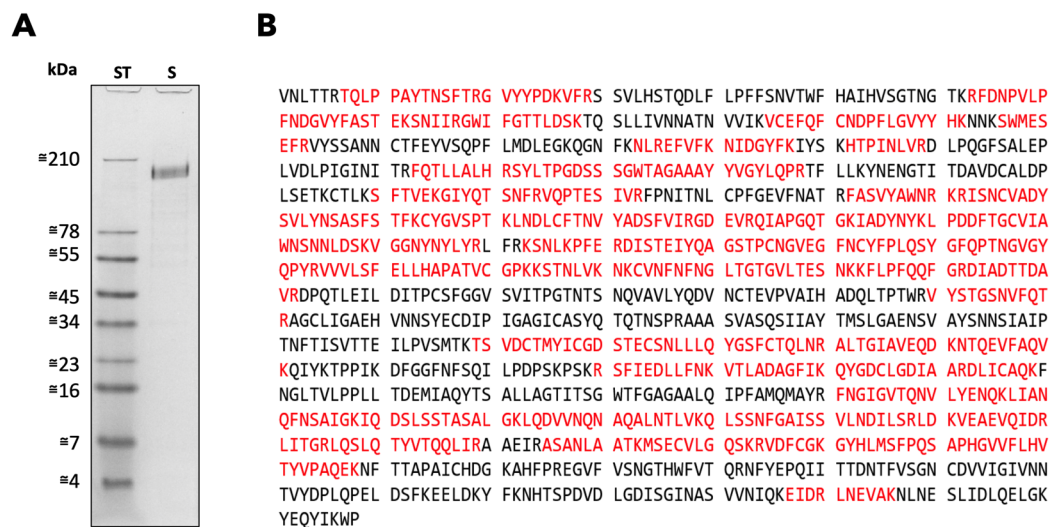

**Figure S1** SARS-CoV-2 S protein sequence and endotoxin content. (A) 1  $\mu$ g of SARS-CoV-2 S protein was separated by SDS-PAGE (16.5% Tris-Tricine gel) followed by Coomassie staining. (B) LC-MS/MS data were obtained after in gel digestion of SARS-CoV-2 S protein after SDS-PAGE separation. Database analysis confirmed the identity of the recombinant protein to SARS-CoV-2 S protein identifying 56% of the protein sequence as shown in red. Totally 110 peptides correspond to the protein sequence, two other proteins were detected i.e. keratin type II (25% sequence coverage, 14 unique peptides) and keratin type I (9% sequence coverage, 5 unique peptides).

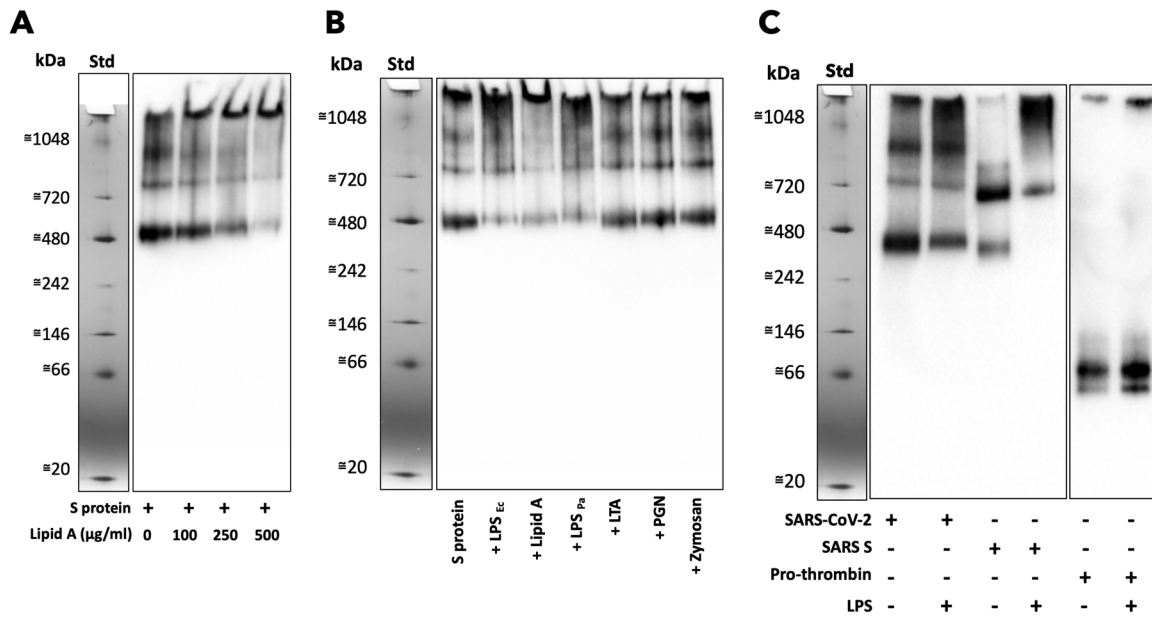

**Figure S2** Analysis of binding of SARS-CoV-2 S protein to different TLR ligands or of SARS-CoV S protein to LPS. BN-PAGE followed by Western blotting of (A) SARS-CoV-2 S protein incubated with 0-0.5 mg/ml of Lipid A; (B) SARS-CoV-2 S protein incubated with 0.25 mg/ml of LPS from *E. coli* (LPS<sub>Ec</sub>), Lipid A, LPS from *P. aeruginosa* (LPS<sub>Pa</sub>), LTA, PGN and zymosan; (C) SARS-CoV-2 S protein, SARS-CoV S protein (SARS S) and prothrombin with *E. coli* LPS (0.74 M : 250 µg/ml, protein : LPS).

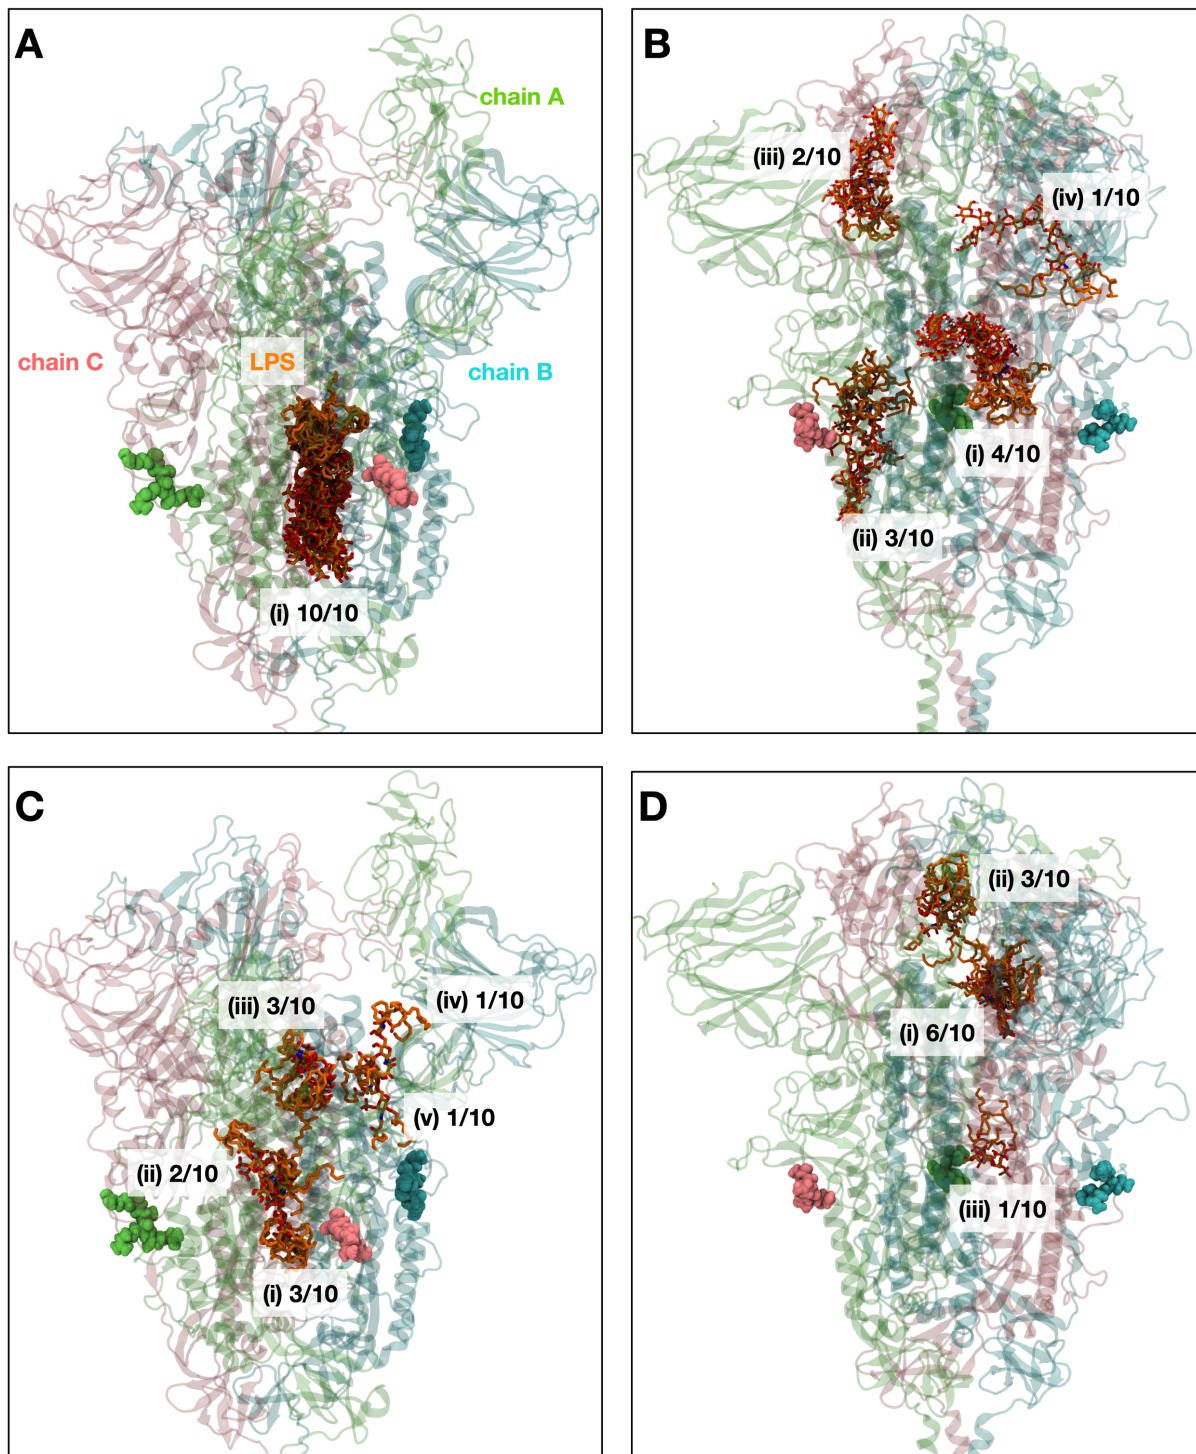

**Figure S3** The binding poses generated by flexible docking of *E. coli* LPS and Lipid A on S ECD. **(A)** Docking of LPS (orange; stick representation) onto S ECD in open conformation (green, cyan and pink; cartoon representation). **(B)** Docking of LPS onto S ECD in closed conformation. **(C)** Docking of Lipid A onto S ECD in open conformation. **(D)** Docking of Lipid A onto S ECD in closed conformation. The number of docking poses for each binding site (out of 10 total poses in each docking calculation) are shown. The S1/S2 furin cleavage sites are highlighted in sphere representation.



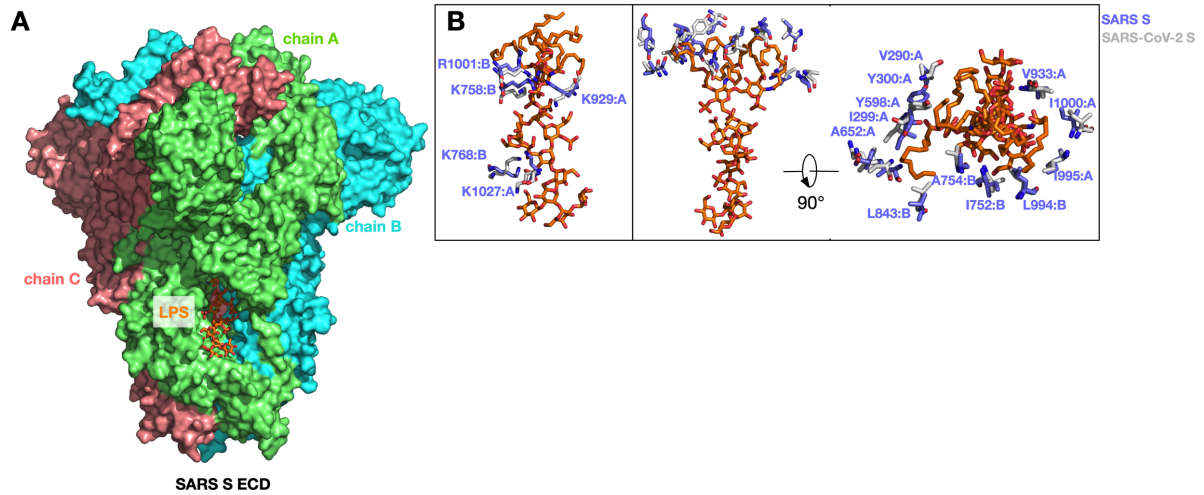

**Figure S4** Comparison of SARS-CoV-2 and SARS-CoV S proteins. **(A)** The cryo-EM structure of SARS-CoV S ECD (PDB: 5X58) was aligned to the structure of SARS-CoV-2 S ECD (PDB: 6VSB) and the docked LPS molecule from the latter was mapped to the former. **(B)** The conservation of residues important for binding in the proposed LPS binding site. Residues from SARS-CoV S are shown in purple and labelled, while corresponding residues from SARS-CoV-2 S are shown in white.

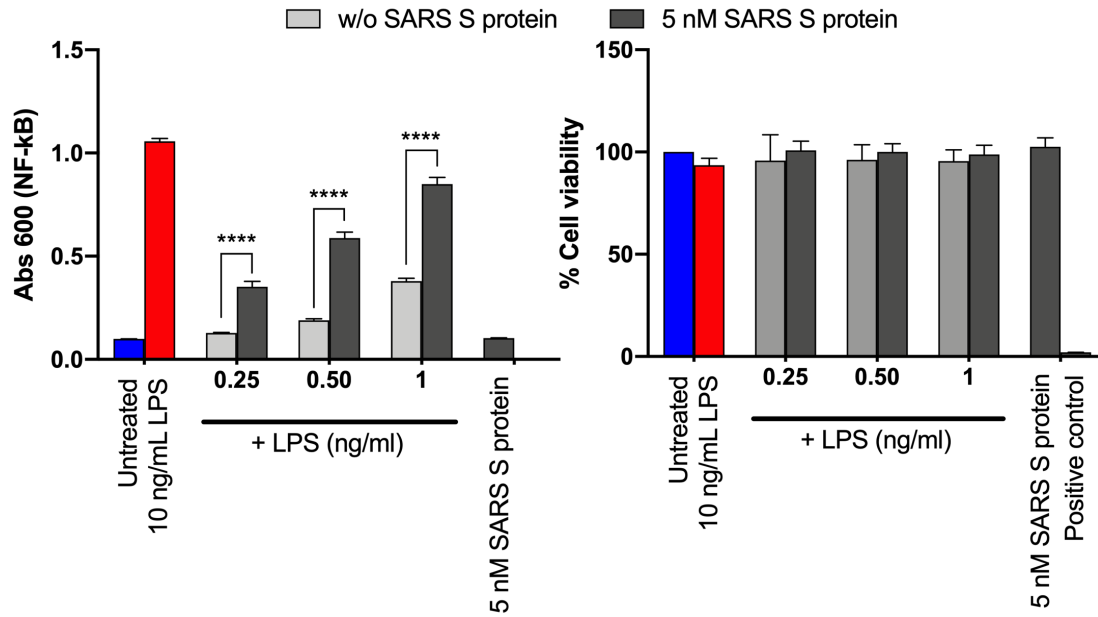

**Figure S5** Effects of SARS-CoV S protein on LPS-induced responses in THP-1 cells. THP-1-XBlue-CD14 cells were treated with increasing concentrations of LPS (0.25-1 ng/ml) and 5 nM SARS-CoV S protein (SARS S) then the NF-κB activation was measured. The viability of THP-1 cells after treatment with SARS S protein and LPS was measured by MTT. The mean  $\pm$  SEM (NF-κB) or SD (MTT assay) values of four independent experiments performed in triplicate are shown (n=4). \*\*\*\*,  $P < 0.0001$ , determined using two-way ANOVA with Sidak's multiple comparisons test (NF-κB) or one-way ANOVA with Dunnett's multiple comparison test (MTT assay). na; not analyzed, w/o; without.

## Supplementary Table

Table S1. Data for cytokines released from human PBMCs.

| Cytokine/<br>Chemokine<br>(pg/ml) | Mean $\pm$ SEM                 |                   |                   | Mean $\pm$ SEM |                   |                   |                    |
|-----------------------------------|--------------------------------|-------------------|-------------------|----------------|-------------------|-------------------|--------------------|
|                                   | 0.05 ng/ml LPS                 |                   | <i>P</i> value    | 0.1 ng/ml LPS  |                   | <i>P</i> value    |                    |
|                                   | -                              | + 5 nM S protein  |                   | -              | + 5 nM S protein  |                   |                    |
| <b>8 h</b>                        | <b>TNF-<math>\alpha</math></b> | 1289 $\pm$ 218.2  | 2824 $\pm$ 311.2  | <b>0.0387</b>  | 2204 $\pm$ 350.7  | 3913 $\pm$ 392.3  | <b>0.0182</b>      |
|                                   | <b>IL-6</b>                    | 5328 $\pm$ 1354   | 10651 $\pm$ 1876  | <b>0.0336</b>  | 9306 $\pm$ 1690   | 14316 $\pm$ 1512  | <b>0.0164</b>      |
|                                   | <b>IL-1<math>\beta</math></b>  | 262.3 $\pm$ 63.6  | 776.4 $\pm$ 185.3 | 0.1747         | 560 $\pm$ 112.7   | 1326 $\pm$ 264.9  | 0.1445             |
|                                   | <b>IL-8</b>                    | 3935 $\pm$ 165.2  | 4088 $\pm$ 96.2   | 0.7571         | 4171 $\pm$ 36.0   | 4257 $\pm$ 54.5   | 0.7953             |
|                                   | <b>IFN-<math>\beta</math></b>  | 2.1 $\pm$ 0.0     | 4.5 $\pm$ 0.5     | 0.1034         | 2.3 $\pm$ 0.1     | 4.4 $\pm$ 0.1     | <b>&lt; 0.0001</b> |
|                                   | <b>CCL5</b>                    | 557.5 $\pm$ 160.1 | 682.9 $\pm$ 115   | 0.6378         | 647.1 $\pm$ 118.4 | 647 $\pm$ 114.2   | > 0.9999           |
|                                   | <b>IL-10</b>                   | 56.28 $\pm$ 5.0   | 138 $\pm$ 18.12   | 0.0926         | 100.8 $\pm$ 10.6  | 191.4 $\pm$ 28.3  | 0.1999             |
| <b>24 h</b>                       | <b>TNF-<math>\alpha</math></b> | 1147 $\pm$ 141.2  | 2379 $\pm$ 259    | <b>0.0423</b>  | 2050 $\pm$ 602    | 3365 $\pm$ 413.3  | 0.2796             |
|                                   | <b>IL-6</b>                    | 7732 $\pm$ 1885   | 14142 $\pm$ 1995  | <b>0.0124</b>  | 11463 $\pm$ 3353  | 16013 $\pm$ 2940  | 0.0818             |
|                                   | <b>IL-1<math>\beta</math></b>  | 307.7 $\pm$ 78.8  | 992.7 $\pm$ 205.1 | 0.1295         | 655.1 $\pm$ 218.2 | 1636 $\pm$ 313.8  | 0.1133             |
|                                   | <b>IL-8</b>                    | 4356 $\pm$ 63.8   | 3655 $\pm$ 716.1  | 0.8811         | 3854 $\pm$ 621.1  | 4403 $\pm$ 48.4   | 0.9247             |
|                                   | <b>IFN-<math>\beta</math></b>  | 2.0 $\pm$ 0.1     | 3.0 $\pm$ 0.1     | <b>0.0404</b>  | 2.0 $\pm$ 0.1     | 3.1 $\pm$ 0.1     | 0.0563             |
|                                   | <b>CCL5</b>                    | 496 $\pm$ 124.6   | 645.2 $\pm$ 132.4 | 0.3902         | 565 $\pm$ 159.6   | 716.6 $\pm$ 156.5 | 0.6499             |
|                                   | <b>IL-10</b>                   | 124.4 $\pm$ 28.76 | 817.4 $\pm$ 264.6 | 0.3199         | 290.4 $\pm$ 102   | 1441 $\pm$ 435.4  | 0.4620             |

*P* values were determined using a one-way ANOVA with Tukey's post test. LPS + S protein groups are compared with their respective LPS alone groups (-). *P* values <0.05 are in bold text.
